# Supplementary material for: Preclinical safety, pharmacokinetics, pharmacodynamics, and biodistribution studies with Ad35K++ protein: a novel rituximab cotherapeutic
Source: PubMed Central journal article supplement — Mol Ther Methods Clin Dev. 2016 Mar 30;5:16013–. doi: 10.1038/mtm.2016.13 (PMC4813608; doi:10.1038/mtm.2016.13), 2016-03-30
Supplement: mtm201613-s1.pdf [file mtm201613-s1.pdf]

**Suppl. Table 1. Animals used in this study**

| <b>ID#</b> | <b>Dose<br/>(mg/kg)</b> | <b>Sex</b> | <b>Age</b> | <b>Weight<br/>(kg)</b> | <b>Necropsy</b> | <b>Study</b>          |
|------------|-------------------------|------------|------------|------------------------|-----------------|-----------------------|
| A14170     | 0.05                    | F          | 7y8m       | 6.32                   | Day 7           | Dose range<br>finding |
| A14172     | 0.2                     | F          | 7y5m       | 6.23                   | “               | “                     |
| A14396     | 2                       | F          | 9y9m       | 5.17                   | “               | “                     |
| A14391     | 20                      | F          | 8y8m       | 3.65                   | “               | “                     |
| A14401     | 2                       | M          | 8y3m       | 5.05                   | 6 hours         | Biodistribution       |
| A14164     | 4                       | F          | 8y5m       | 3.3                    | Day 14          | Efficacy              |

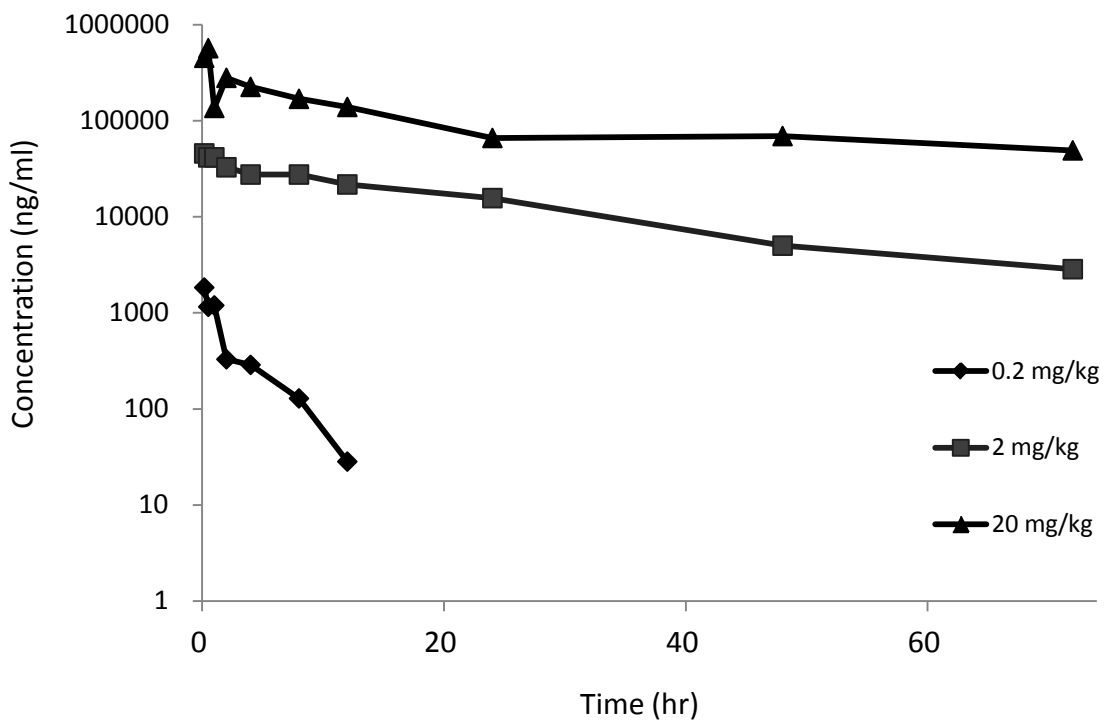

Suppl. Fig.1

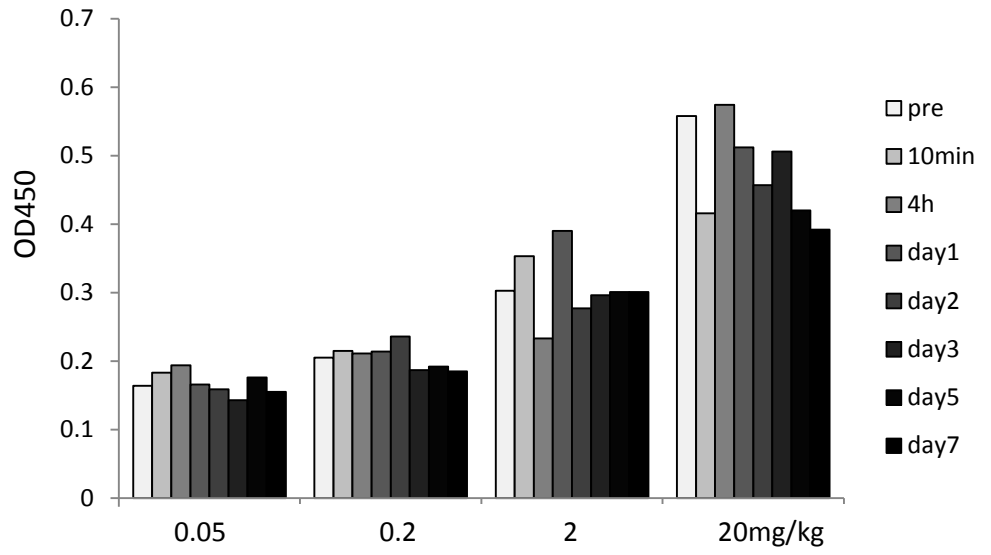

Suppl. Fig.2

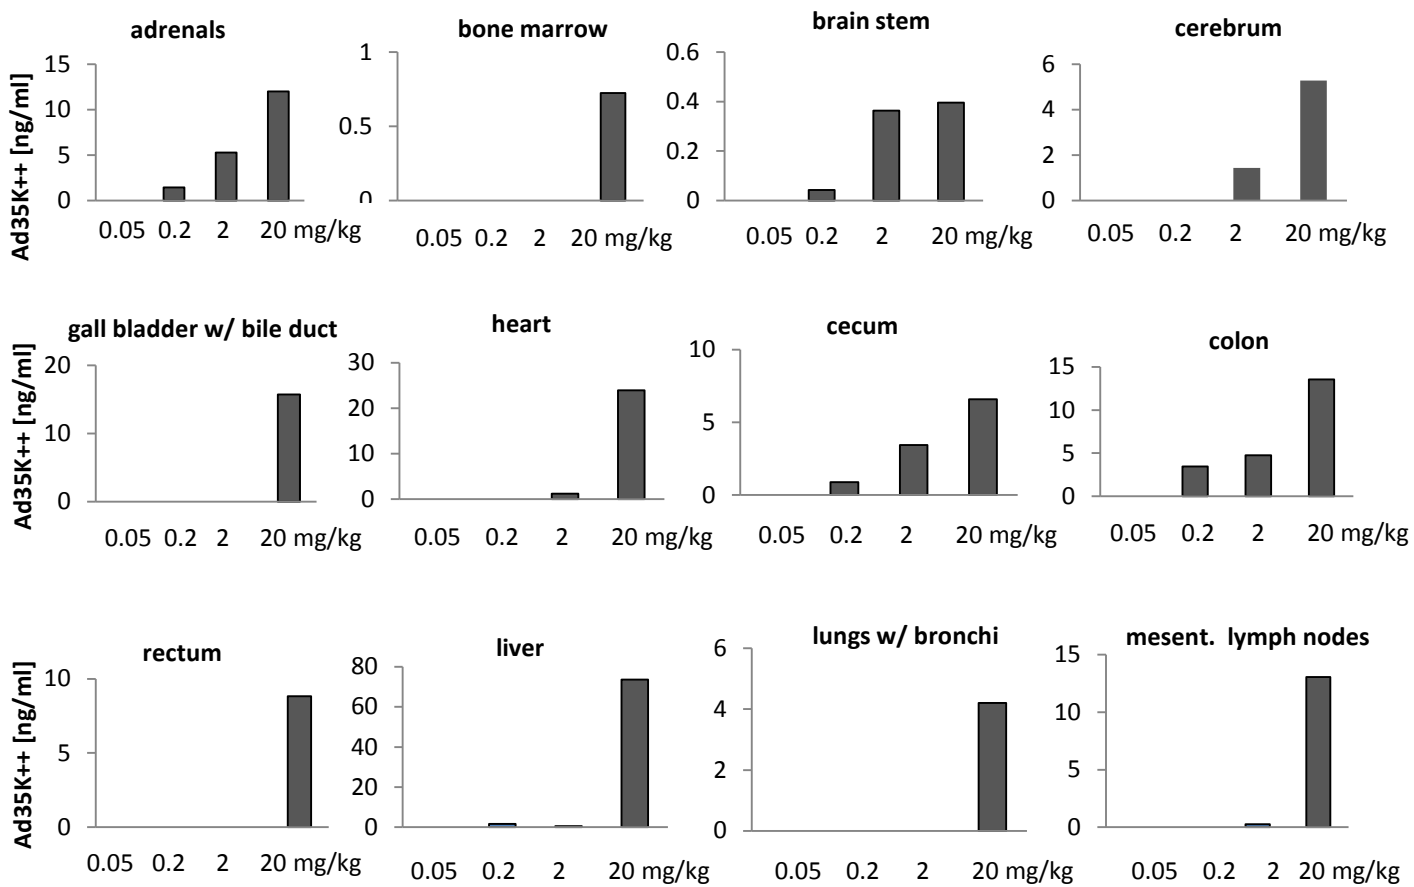

Suppl. Fig.3

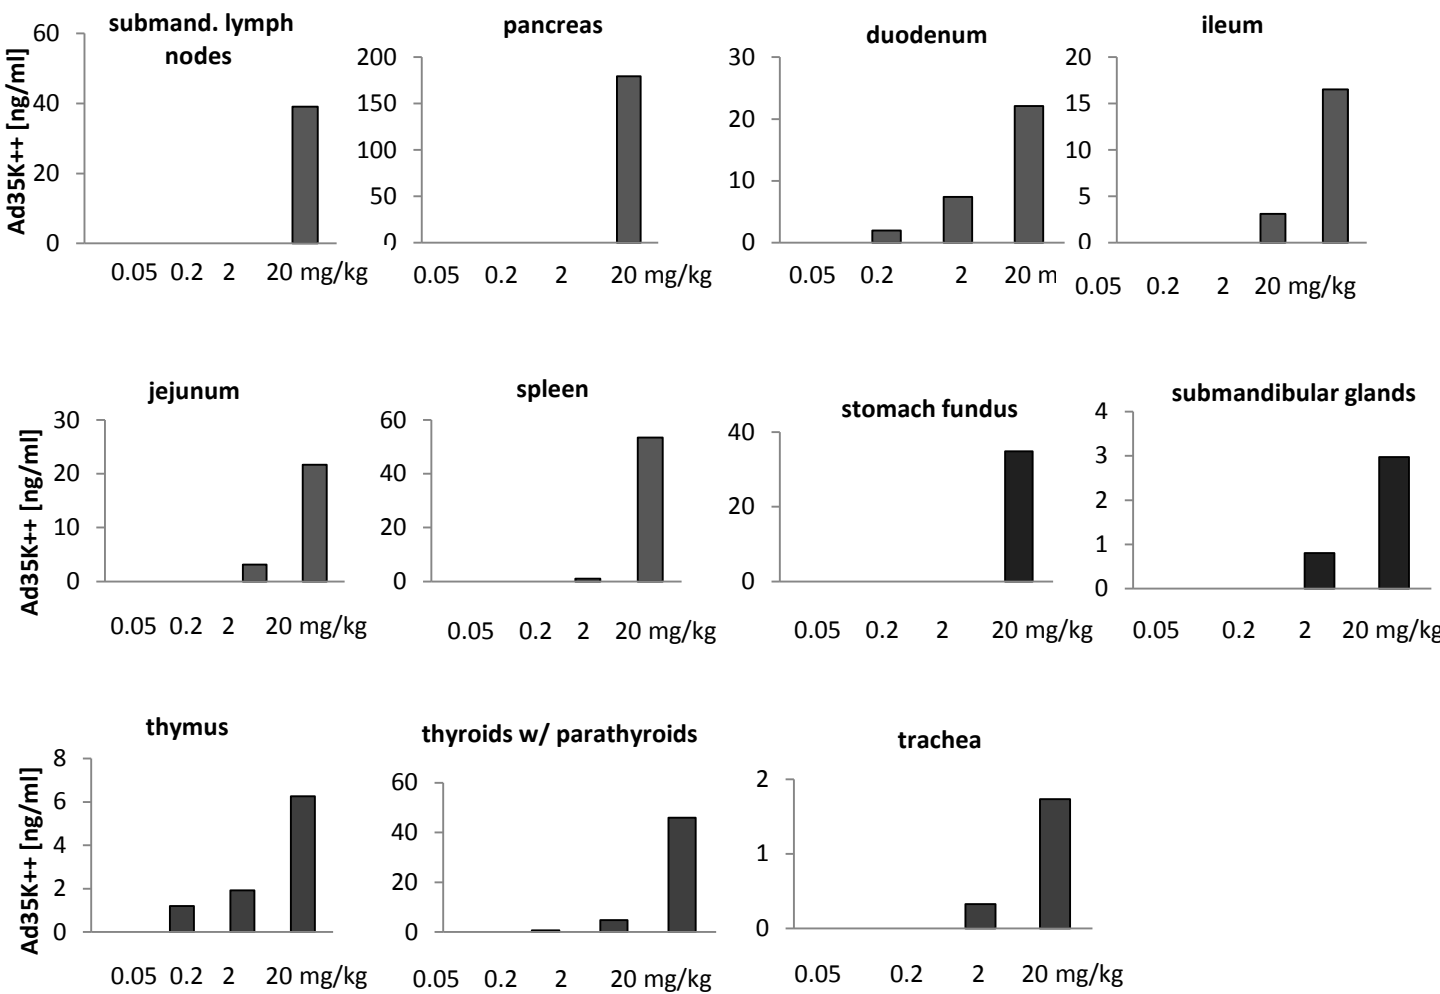

Suppl. Fig.3 continued

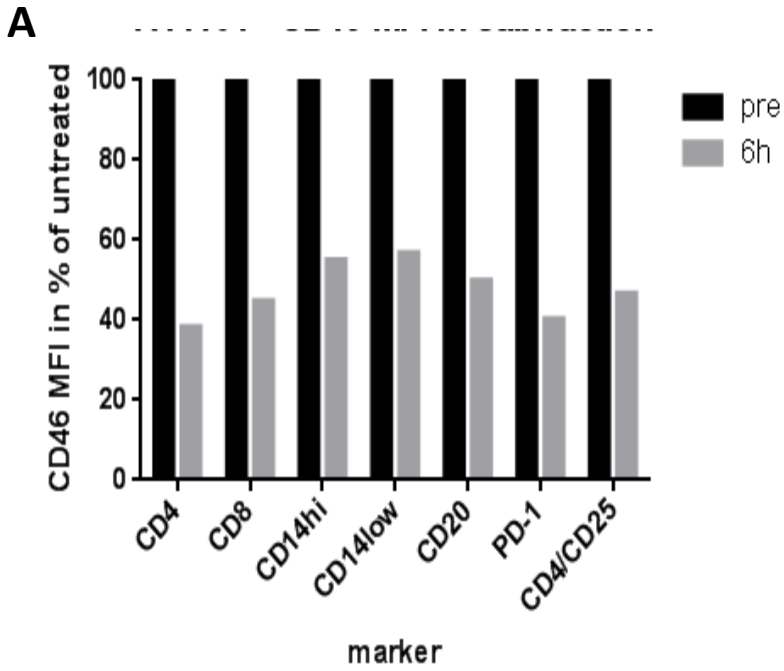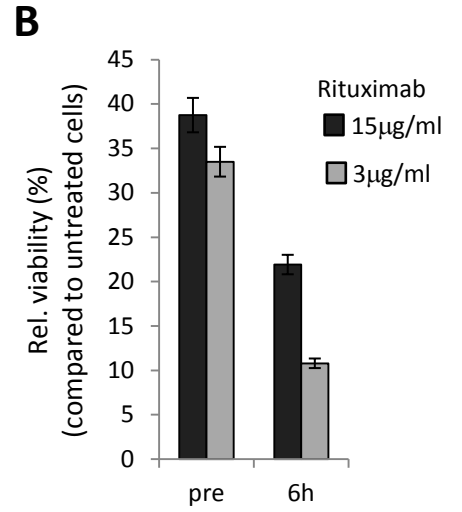

Suppl. Fig.4
